1 **Biofilm development on urinary catheters promotes the appearance**  
2 **of viable but non-culturable (VBNC) bacteria**

3

4 Sandra A. Wilks<sup>#a</sup>, Verena V. Koerfer<sup>b,c</sup>, Jacqui A. Prieto<sup>a</sup>, Mandy Fader<sup>a</sup>, C.  
5 William Keevil<sup>b</sup>

6

7 Running title: Biofilm development on urinary catheters materials

8 <sup>a</sup>School of Health Sciences, University of Southampton, Southampton, UK

9 <sup>b</sup>School of Biological Sciences, University of Southampton, Southampton, UK

10 <sup>c</sup>University Duisburg-Essen, Essen, Germany

11

12 Running Head: Biofilm development on urinary catheters: appearance  
13 of viable but non-culturable (VBNC) bacteria

14

15 <sup>#</sup>Address correspondence to: Sandra A. Wilks, S.A.Wilks@soton.ac.uk

16 Abstract word count: 223 Importance word count: 101

17 Text word count: 3,440

18

19 Sandra A Wilks designed the study, carried out experimental work and  
20 prepared the manuscript.

21 Verena V. Koerfer carried out experimental work and data analysis.

22 Jacqui A. Prieto & Mandy Fader provided clinical expertise and reviewed  
23 content.

24 C. William Keevil designed the study and reviewed the manuscript.

25

26 **Biofilm development on urinary catheters promotes the appearance**  
27 **of viable but non-culturable bacteria**

28

29 **ABSTRACT**

30 Catheter-associated urinary tract infections have serious consequences, both  
31 for patients and in impacting on healthcare resources. Much work has been  
32 carried out to develop an antimicrobial catheter. Although such developments  
33 have shown promise under laboratory conditions, none have demonstrated a  
34 clear advantage in clinical trials.

35

36 Using a range of microbiological and advanced microscopy techniques, a  
37 detailed laboratory study comparing biofilm development on silicone, hydrogel  
38 latex and silver alloy coated hydrogel latex catheters was carried out. Biofilm  
39 development by *Escherichia coli*, *Pseudomonas aeruginosa* and *Proteus*  
40 *mirabilis* on three commercially available catheters was tracked over time.

41 Samples were examined with episcopic differential interference contrast  
42 (EDIC) microscopy, culture analysis and staining techniques to quantify viable  
43 but non-culturable (VBNC) bacteria.

44

45 Both qualitative and quantitative assessment found biofilms to develop rapidly  
46 on all three materials. EDIC microscopy revealed the rough surface  
47 topography of the materials. Differences between culture counts and  
48 quantification of total and dead cells demonstrated the presence of VBNC  
49 populations, where bacteria retain viability but are not metabolically active.

50



51 The use of non-culture based techniques showed the development of  
52 widespread VBNC populations. These VBNC populations were more evident  
53 on silver alloy coated hydrogel latex catheters, indicating a bacteriostatic  
54 effect at best. The laboratory tests reported here, that detect VBNC bacteria,  
55 allow more rigorous assessment of antimicrobial catheters offering an  
56 explanation for why there is often minimal benefit to patients.

57

## 58 **IMPORTANCE**

59 Several antimicrobial urinary catheter materials have been developed but,  
60 although laboratory studies may show a benefit, none have significantly  
61 improved clinical outcomes. The use of poorly designed laboratory testing and  
62 lack of consideration to the impact of VBNC populations may be responsible.  
63 While the presence of VBNC populations is becoming more widely reported,  
64 there remains a lack of understanding of the clinical impact or influence of  
65 exposure to antimicrobial products. This is the first study to investigate the  
66 impact of antimicrobial surface materials and the appearance of VBNC  
67 populations. This demonstrates how improved testing is needed prior to  
68 clinical trials uptake.

69

70

## 71 INTRODUCTION

72 Urinary tract infections (UTIs) are the second most frequent cause of  
73 healthcare associated infections among hospitalized patients across Europe,  
74 with 60% attributable to indwelling urinary catheterization (catheter associated  
75 UTI, CAUTI). The use of a catheter increases the likelihood of bacteriuria  
76 [1,2]. Indeed, recent microbiome research in the healthy bladder [3,4] has  
77 shown urine not to be sterile, with asymptomatic bacteriuria routinely found  
78 when advanced molecular sequencing is used. Bacteriuria and the presence  
79 of a catheter result in a high risk of biofilm development, where bacteria attach  
80 to the catheter material, forming complex communities and increasing  
81 antibiotic resistance. Biofilms are known to have a role in CAUTI development  
82 and in catheter blockage, commonly caused by the presence of urease-  
83 producing bacteria.

84

85 The role of biofilms has been considered in laboratory-based studies  
86 [5,6,7,8,9,10,11] and there has been considerable work to develop  
87 antimicrobial materials [12,13,14,15]. While several have shown promise  
88 during laboratory testing, few have been assessed clinically. An exception is  
89 the use of silver alloy coated/impregnated catheters which became common  
90 in clinical settings, with *in vitro* evidence indicating a reduction in the incidence  
91 of CAUTI [16,17,18]. However, in a large-scale clinical trial involving  
92 approximately 7000 patients, Pickard et al. [19] demonstrated no difference in  
93 the incidence of infection between standard, uncoated catheters and silver  
94 impregnated/coated catheters in patients undergoing short-term

95 catheterization. The trial did, however, note a reduction in bacteriuria in  
96 patients using the silver catheters.

97

98 This raises important questions as to why the trial data differed from what  
99 laboratory studies predicted. It would be expected that a polymicrobial  
100 community and the presence of human tissue *in vivo* would affect activity  
101 compared to controlled laboratory conditions. Also, it is known that bacteriuria  
102 does not inevitably lead to infection. However, the analytical techniques used  
103 and metabolic state of the bacteria can also have an impact and these are  
104 often neglected in studies.

105

106 To assess the antimicrobial activity of a material, attached cells are often  
107 removed and placed on nutritious agar media. This can lead to an  
108 underestimation of a biofilm population due to inefficiencies in removal and  
109 the presence of viable but non-culturable (VBNC) bacteria. VBNC bacteria  
110 arise from cells being sub-lethally stressed and being unable to grow on rich  
111 nutrient media, thus leading to an underestimation of population density  
112 [20,21,22]. VBNC bacteria can retain infectivity [22,23] and may be implicated  
113 in chronic, recurring infections as this metabolic state can be induced by the  
114 action of antibiotics [21,24]. Previously described methods to study biofilm  
115 development on urinary catheters can be limiting, as outlined recently [11]. It  
116 is also important to consider that bacteria within a biofilm state can have an  
117 altered phenotype and behave differently than their planktonic counterparts.

118

119 In the current study, a combination of *in situ* advanced microscopy [11,23] and  
120 *ex situ* viability staining and culture analyses, have been used to track biofilm  
121 development by three commonly found and clinically important bacterial  
122 uropathogens (*Escherichia coli*, *Pseudomonas aeruginosa* and *Proteus*  
123 *mirabilis*), on three catheter materials: silicone, hydrogel latex and silver alloy  
124 coated hydrogel latex, in a physiologically correct artificial urine medium.  
125 Using techniques specific to the detection of biofilms and VBNC bacteria, we  
126 illustrate how different catheter materials affect bacterial attachment, biofilm  
127 formation and can lead to increased VBNC populations.  
128

## 129 **RESULTS**

### 130 **Unused catheters**

131 EDIC microscopy allowed rapid examination of silicone, hydrogel latex and  
132 silver alloy coated catheters (Figure 1a-c). The silicone catheter (Figure 1a)  
133 had a smooth topography but there was evidence of pitting and undulations  
134 as well as parallel striations formed by extrusion during the manufacturing  
135 process. In contrast, the hydrogel and silver alloy coated catheters (Figures  
136 1b & c) had highly disordered, rough surface topographies. For all three  
137 materials, there were numerous potential bacterial attachment sites.

138

139 Figure 1

140

### 141 **Qualitative assessment of biofilm development**

#### 142 **Silicone**

143 It was possible to use EDIC microscopy to visualize and track biofilm  
144 development on silicone catheters. Figures 2a-f show an example sequence  
145 from initial attachment progressing to biofilm development when *E. coli* was  
146 inoculated into artificial urine. Over the first 6 h exposure, there was a gradual  
147 increase in attached bacteria and material, from individual cells (2 h) to clear  
148 clustering and increasing density by 6 h (Figures 2a-c). Following 6 h  
149 exposure, distinct microcolony development was seen with associated  
150 extracellular polymeric substances (EPS) forming. After 24 h, a thick layer  
151 covered almost the entire surface and this continued over 48 h (Figures 2d &  
152 e). When sections were left for 72 h, channels and areas where biofilm had

153 sloughed away were apparent, suggesting nutrient limitation, detachment  
154 events and exposed areas ready for re-colonisation (Figure 2f).

155

156 Figure 2

157

158 Similar results were obtained for both *P. aeruginosa* (Figures 3a-f) and *P.*  
159 *mirabilis* (Figures 4a-f). *P. aeruginosa* rapidly colonised the surface, leading to  
160 increased microcolony formation and large amounts of extra polymeric  
161 substances (EPS). After 24 h exposure, thickening of the biofilm was  
162 observed with stacks of microcolonies extending out from the surface (Figure  
163 3d). There was no evidence of sloughing or detachment at increased  
164 exposure times (Figures 3e & f) but areas with increased reflectance indicated  
165 crystal formation and deposition due to urease activity. For *P. mirabilis*, single  
166 cell attachment occurred rapidly and after 6 h exposure an open mosaic  
167 structure was observed (Figure 4c). As reported previously [11], this was  
168 followed by almost complete coverage of the surface with evidence of crystal  
169 formation clear by 48 h and after 72 h, large areas had sloughed away,  
170 creating sites for re-colonisation (Figures 4d-f).

171

172 Figure 4

173

#### 174 **Hydrogel latex/silver**

175 It was not possible to follow the early stages of bacterial attachment on either  
176 material due to the highly disordered surface topographies. Some evidence of  
177 crystalline biofilm development could be seen over longer exposure times (24,

178 48 and 72 h exposure) for *P. aeruginosa* (Figures 5a-c) and *P. mirabilis*  
179 (Figures 6a-c) due to urease production.

180

181 Figure 5

182 Figure 6

183

#### 184 **Quantitative assessment of biofilm formation**

185 Three methods were used to quantify biofilm development: staining with  
186 SYTO 9 (total cell counts, TCC), staining with PI (dead cells, dead) and  
187 culture analysis (colony forming units, cfu).

#### 188 ***E. coli***

189 The attachment and development of *E. coli* biofilms over 72 h was assessed  
190 and quantified with results shown in Figures 7a-c, for silicone, hydrogel latex  
191 and silver alloy coated hydrogel latex respectively, with the percentage of the  
192 population in a VBNC state given (refer to equation 1). There were no  
193 significant differences between cfu, TCC and dead counts over time or  
194 between catheter materials ( $P < 0.05$ ).

195

$$196 \quad \% \text{ VBNC} = \frac{[TCC - (CFU + DEAD)]}{TCC} \times 100$$

197 Equation 1. Calculation of the percentage VBNC cells within total population  
198 where TCC = total number of cells (SYTO 9 labelled), CFU = colony forming  
199 units representing culturable cells, and DEAD = non-viable cells (PI labelled).

200

201 Figure 7

202

203 On silicone (Figure 7a), after 2 h exposure there was a greater than 1 log  
204 difference between the sum of cfu plus dead cells and the TCC counts,  
205 suggesting at least 90% of the population were VBNC. This was also  
206 observed after 48 and 72 h exposure, where there was an approximate 0.5  
207 log difference. On hydrogel latex (Figure 7b), after 24 h and greater exposure  
208 times, the cfu counts were equal or greater than the TCC with many cells  
209 undergoing cell division when examined under the microscope. The early time  
210 points did show evidence of VBNC populations but these decreased from  
211 93% after 2 h to 13% at 6 h. A different pattern was found on silver alloy  
212 coated hydrogel latex catheters (Figure 7c) where, although cfu counts  $\geq$  TCC  
213 at 24 h and longer exposure time points, in the first 4 h the sum of cfu plus  
214 dead cells remained between 1 - 2 log lower than TCC, suggesting the  
215 presence of a VBNC population of  $> 90\%$ , only decreasing to 52% at 6 h.  
216

### 217 ***P. aeruginosa***

218 The attachment and development of *P. aeruginosa* biofilms over 72 h was  
219 assessed and quantified, with results shown in Figures 8a-c for silicone,  
220 hydrogel latex and silver alloy coated hydrogel latex respectively, with the  
221 percentage of the population in a VBNC state given (refer to equation 1).  
222 When comparing the three materials there were some significant differences  
223 ( $P < 0.05$ ). Dead cell counts were significantly different at the longer exposure  
224 times  $\geq 24$  h, with silicone  $<$  silver alloy  $<$  hydrogel latex. However, at 48 h,  
225 TCC were also significantly different in the same order, with the highest  
226 values recorded for hydrogel latex. The only significant difference for cfu



227 values was after 72 h where results on hydrogel latex (Figure 8b) were almost  
228 2 log higher than for silver alloy coated hydrogel latex (Figure 8c).

229

230 Figure 8

231

232 On silicone (Figure 8a), at 2 h exposure, cfu values plus dead counts were  
233 over 1 log lower than TCC indicating the presence of VBNC cells (90% of the  
234 population). However, at longer time points, cfu counts were greater than TCC  
235 with many cells in the process of dividing and hence underestimated, with no  
236 evidence of VBNC formation. For hydrogel latex (Figure 8b), there was little  
237 difference between TCC and cfu, although 70% of the population were in a  
238 VBNC state at 2 h and 32% after 4 h. This pattern was followed but increased  
239 on silver alloy coated hydrogel latex (Figure 8c), cfu plus dead cells were  
240 approximately 1 log lower than TCC after 2 h with 88% of the population in a  
241 VBNC state reducing to 42% at 4 h.

242

243 ***P. mirabilis***

244 The attachment and development of *P. mirabilis* biofilms over 72 h was  
245 assessed and quantified, with results shown in Figures 9a-c for silicone,  
246 hydrogel latex and silver alloy coated hydrogel latex respectively, with the  
247 percentage of the population in a VBNC state given (refer to equation 1).  
248 When comparing materials, the TCC values were significantly different at all  
249 time points with silver alloy < silicone < hydrogel latex. The cfu and dead cell  
250 counts did not differ significantly across materials.

251

252 Figure 9

253

254 On silicone (Figure 9a), there were no significant differences over time;  
255 however, there was evidence of VBNC populations at all time points with an  
256 approximate 2 log difference between the sum of cfu plus dead cells and TCC  
257 after 2 and 72 h exposure times (94 and 97% respectively). This was also  
258 seen on hydrogel latex (Figure 9b) with an approximately 2 log ( $\leq 95\%$ )  
259 difference at the longer exposure times of 48 and 72 h. Likewise, with the  
260 exception of 24 h, the number of cfu was always over 1 log (ranging between  
261 53 - 90%) lower than the TCC on silver alloy coated hydrogel latex (Figure  
262 9c).

263

## 264 **DISCUSSION**

265 Despite continued efforts to produce effective antimicrobial catheter materials  
266 and coatings that resist biofilm development, the problems of CAUTI and  
267 blockage prevail. To date, no material has been found to improve clinical  
268 outcomes significantly over long-term use and many are described as being  
269 bacteriostatic rather than bactericidal.

270

271 The use of silver alloy coatings and impregnated catheters has been shown to  
272 reduce bacterial numbers in *in vitro* studies [16,17,18,25]. Indeed, Gabriel et  
273 al. [25] reported on the efficacy of a silver-coated catheter in 1996, leading to  
274 subsequent clinical approval. While silver-coated/impregnated catheters  
275 became widely adopted, several *in vivo* studies have indicated that any  
276 positive benefit of using silver coated or impregnated catheters is short-term

277 only (< 7 days) [26,27,28,29], with a delay in colonization observed. In these  
278 cases, the antimicrobial action of silver can, at best, be described as  
279 bacteriostatic. This was also demonstrated in a large, randomised, multicentre  
280 trial [19] where no reduction in CAUTI following the use of silver alloy coated  
281 catheters compared to nitrofurantoin-impregnated and PTFE-coated catheters was  
282 found. Results from this study indicated that to prevent one incidence of  
283 CAUTI at least 1000 people would need to be using the silver alloy coated  
284 catheter. This contradicts the findings of previous studies [30,31], which had  
285 led to the recommendation of silver alloy coated catheters for routine short-  
286 term use in the UK and USA. This questions whether appropriate *in vitro*  
287 studies could have prevented the subsequent recommendation for clinical  
288 use. Indeed, early studies such as by Johnson et al. [16] did report that  
289 alternative antimicrobial catheter materials, such as nitrofurazone containing,  
290 significantly outperformed silver hydrogel catheters.

291

292 In the current study we have tracked biofilm formation and investigated  
293 whether metabolically inactive, VBNC populations arise on three catheter  
294 materials, including a silver-alloy, and could be responsible for clinical  
295 outcome failures.

296

297 The VBNC state remains poorly understood although it has been reported to  
298 occur in a wide range of bacterial species covering most phyla [21]. The  
299 majority of work has focused on non-clinical environments including water  
300 [32,33,34] and food production [22], with several referencing biofilms as  
301 providing a reservoir niche. The impact of VBNC bacteria in clinical infection

302 risk remains poorly understood with the role of persisters (cells that  
303 demonstrate antibiotic tolerance with restored growth on/in nutrient media  
304 once the stress is removed) more frequently studied [35]. There remains  
305 debate on the similarities and differences on the metabolic state of persister  
306 and VBNC cells [21,36,37], with a continuum in metabolic activity from dead  
307 to actively growing seeming likely [21]. Moreover, several studies [22,34] have  
308 demonstrated how VBNC cells, even in a 'deeper' level of dormancy can lead  
309 to infection in animal models. Additionally, it is well known that any medical  
310 device which enters the body provides a high-risk interface for bacterial  
311 attachment and biofilm formation. It is also known that both VBNC and  
312 persister cells can be commonly isolated from biofilms where stressors such  
313 as nutrient depletion, redox gradients and pH/ionic changes can occur.

314

315 Considering these factors, and our recent understanding of the diverse urinary  
316 microbiome [3], the potential for VBNC populations to form on urinary  
317 catheters is high, however this has not been explored previously. As CAUTI  
318 (particularly in chronic, recurring infections and blockages) and rapid biofilm  
319 development on urinary catheters are well-documented but no antimicrobial  
320 material (whether impregnated or coated) has been successful clinically in  
321 long-term patients, the appearance of VBNC populations may be an important  
322 factor. Indeed, the implications of VBNC populations in any device-related  
323 contamination and infection has not been widely considered or studied.

324

325 Using a combination of qualitative and quantitative methods, we tracked  
326 bacterial attachment, biofilm formation and the appearance of VBNC

327 populations over time on three different catheter materials; silicone, hydrogel  
328 latex, and silver alloy impregnated hydrogel latex. The use of EDIC  
329 microscopy (11,38) demonstrated how, for all three species of bacteria tested,  
330 initial attachment was rapid, occurring in less than 2 h. *E. coli* showed biofilm  
331 maturation over the first 48 h before exhibiting a typical mosaic pattern with  
332 detachment events. In contrast, the biofilm-forming *P. aeruginosa* showed no  
333 signs of detachment, forming an extensive and thick biofilm with evidence of  
334 stack formation. The urease-producing species (*P. mirabilis* and *P.*  
335 *aeruginosa*) showed evidence of microcrystalline formation and in the former,  
336 to the development of complex crystalline encrustations, which lead to  
337 catheter blockages. This corresponds to work by Wilks et al. [11] where four  
338 distinct stages were identified.

339

340 Such qualitative observations are useful in understanding the susceptibility of  
341 catheter materials for biofilm development and gross structural characteristics  
342 but do not reflect differences in bacterial numbers or variations in viability and  
343 metabolic state. By using three quantitative methods; culture analysis  
344 (culturable cell count) and separate enumeration of SYTO 9 labelled (total cell  
345 count) and PI labelled (dead cell count) bacteria, we have shown the  
346 presence of an increasing VBNC population on silver alloy coated catheters. If  
347 no VBNC population is present, culture data plus the numbers of dead cells  
348 (PI labelled) should equal the total cell count (SYTO 9 labelled). While results  
349 for *P. aeruginosa* did follow this pattern on all materials (other than at short  
350 time points), indicative of its behavior as a strong biofilm-forming species,  
351 uropathogenic *E. coli* and *P. mirabilis* did not. This implies that VBNC cells are

352 a natural component of the urinary catheter-related biofilms for these two  
353 bacteria. However, increased numbers of VBNC cells were observed on the  
354 silver alloy coated catheters and with little to no evidence of antimicrobial  
355 killing from this material type. Interestingly, a study by Zandri et al. [39]  
356 detected a VBNC population of *Staphylococcus aureus* in biofilms on central  
357 venous catheters removed from patients after implantation times of 3 days to  
358 3 months (77% of 44 samples showed the presence of VBNC *S. aureus*).

359

360 The question arises why previous *in vitro* studies showed significant  
361 antimicrobial properties of silver alloy coated/impregnated catheters, which  
362 led to rapid clinical adoption. Consideration must be given to how experiments  
363 were designed and the measurements collected. These studies have relied on  
364 the growth of bacteria in nutritious laboratory media (where VBNC populations  
365 will be missed) or in minimal media; neither accurately reflecting the  
366 physiological environment of the urinary system. Studies have used  
367 radiolabelled leucine [17,25] to track bacterial adherence, and agar diffusion  
368 where inhibition to sections of catheter materials were measured [16,17] on  
369 Mueller-Hinton agar plates. Samuel and Guggenbichler [18] described four  
370 methods including growth of bacteria released from catheter surfaces by  
371 turbidity readings, measurement of antimicrobial activity by the Dow Shaker  
372 method (immersion in inoculated saline and aliquots of the suspension plated  
373 after set amounts of time), and the roll plate technique (inoculated catheter  
374 sections being rolled over agar plates). The current study utilises a  
375 physiologically correct artificial urine medium, which in itself influences the  
376 attachment and development of biofilms including the impact of urease

377 release and crystal formation [11]. It then becomes clear how the mismatch  
378 between *in vitro* study design could have impacted on the discrepancies seen  
379 in *in vivo* use.

380

381 Although the clinical significance of VBNC bacteria is not fully understood,  
382 there is increasing evidence that they may have an important role in chronic  
383 and persistent infections (Li et al. 2014). The possibility of metabolically  
384 inactive bacteria having a role in UTI persistence was described by Mulvery et  
385 al. [40] who showed how a reservoir of inactive *E. coli* could be found inside  
386 bladder epithelial cells. The implications of such a population have not been  
387 explored further in relation to catheter-associated biofilm risk. Studies are  
388 demonstrating widespread retention of infectivity [22,34], indicating that the  
389 VBNC state could be a key mechanism and their increased antibiotic  
390 tolerance impacts on the efficacy of treatment plans. Indeed, the presence of  
391 a VBNC population, as demonstrated here, is a possible explanation for why  
392 silver alloy coated or impregnated catheters have failed in clinical trials.  
393 If these VBNC cells retain infectivity, this may account for why there was no  
394 reduction in CAUTI in the Pickard study [19], despite previous *in vivo* studies  
395 reporting a reduction in bacteriuria as found using standard urinalysis.

396

397 This work demonstrates the need for rigorous testing of medical device  
398 materials prior to clinical trial and market release, and full understanding of  
399 the implications of bacteriostatic versus bactericidal populations particularly  
400 considering the presence of VBNC populations. By combining several  
401 analysis methods, robust data can be obtained on the real antimicrobial

402 activity of materials. This is vitally important in order to better understand the  
403 potential of new materials to reduce infection, blockage, improve patient care  
404 and quality of life, and reduce the financial burden of CAUTI.

405

406

407

408

409



## 410 **MATERIALS AND METHODS**

### 411 **Bacterial inocula**

412 *Escherichia coli* NCTC 9001, *Pseudomonas aeruginosa* PAO1 and *Proteus*  
413 *mirabilis* NCTC 10975 were grown overnight at 37°C in tryptone soya broth  
414 (TSB) (Oxoid, UK). Aliquots were centrifuged at 3780 x g for 10 min and  
415 pellets resuspended in artificial urine medium [41].

416

### 417 **Biofilm development on catheters**

418 Three indwelling Foley catheters were tested: a 100% silicone (Rüsch), a  
419 hydrogel latex (Bard Biocath Hydrogel) and a silver alloy coated hydrogel  
420 latex (Bard Bardex® I.C.). These were cut longitudinally and transversely to  
421 give approximately 1 cm<sup>2</sup> surface areas sections.

422

423 Catheter sections were placed in six-well tissue culture plates (two per well)  
424 and covered with 3 ml artificial urine [41]. To test wells, the inoculum was  
425 added (to give a final concentration of approximately 10<sup>8</sup> cfu/ml), with each  
426 well representing a separate time point. Control samples did not have  
427 bacterial inocula added. These plates were incubated at 37°C. Samples were  
428 taken after 2, 4, 6, 24, 48 and 72 h exposure. Following removal from  
429 inoculated urine, each catheter section was gently washed with phosphate  
430 buffered saline (PBS).

431

### 432 **Qualitative assessment of biofilm development**

433 One section was set aside for direct analysis by episcopic differential  
434 interference contrast (EDIC) microscopy using a Nikon Eclipse LV100D

435 microscope with EXFO X-Cite 120 metal halide fluorescence system and long  
436 working metallurgical Nikon Plan Achromat objectives (Best Scientific, UK)  
437 [11,38].

438

#### 439 **Quantitative assessment of biofilm development**

440 The second catheter section from each well was used for indirect biofilm  
441 analysis. Biofilm was removed by scraping the surface with a sterile 1 µl  
442 inoculation loop which was transferred to 5 ml of PBS and vortex mixed for 30  
443 sec. This resuspended biofilm was serially diluted in PBS, plated onto  
444 tryptone soya agar (TSA) (Oxoid, UK) and incubated at 37°C overnight.  
445 Resuspended biofilm samples were also stained with the SYTO9/ Propidium  
446 iodide (PI) LIVE/DEAD® BacLight™ system (Invitrogen, UK), to give total cell  
447 counts and numbers of dead cells. In each case, 1.5 µl of either SYTO 9 or  
448 propidium iodide (PI) was added to a 1 ml sample and incubated, in the dark,  
449 for 20 min. Following this, samples were filtered onto black 0.2 µm pore size  
450 diameter polycarbonate filters (Whatman, UK) and placed onto glass slides.  
451 Filters were examined, under epifluorescence illumination, using oil immersion  
452 and numbers of stained bacteria counted across a random selection of 10  
453 fields of view.

454

#### 455 **Statistical analysis**

456 All experiments were repeated in triplicate. Results obtained for culturable  
457 bacteria, total and dead cell counts were log-transformed. Differences  
458 between analysis methods and catheter materials were assessed using a  
459 one-way analysis of variance (ANOVA) followed by Tukey's multiple

460 comparison test (Prism, GraphPad Software Inc.). Differences were  
461 considered significant if  $P < 0.05$ .

462  
463  
464

### **ACKNOWLEDGEMENTS**

465 This work was carried out by V. Koerfer as part of her Master's degree from  
466 University of Duisberg-Essen and as part of an Institute for Life Sciences  
467 (University of Southampton) fellowship awarded to S.A. Wilks.  
468

469 **REFERENCES**

- 470 1. Saint S, Veenstra DL, Sullivan SD. 2000. The potential clinical and  
471 economic benefits of silver alloy urinary catheters in preventing urinary tract  
472 infection. *Arch Intern Med* 160(17): 2670-2675.  
473
- 474 2. Jacobsen SM, Stickler DJ, Mobley HLT, Shirtliff ME. 2008. Complicated  
475 catheter-associated urinary tract infections due to *Escherichia coli* and  
476 *Proteus mirabilis*. *Clin Microbiol Rev* 21(1): 26-59.  
477
- 478 3. Wolfe AJ, Brubaker L. 2015. "Sterile urine" and the presence of bacteria.  
479 *Eur Urol* 68(2): 173-174.  
480
- 481 4. Wolfe AJ, Toh E, Shibata N, Rong R, Kenton K, Fitzgerald M, Mueller ER,  
482 Schreckenberger P, Dong Q, Nelson DE, Brubaker L. 2012. Evidence of  
483 uncultivated bacteria in the adult female bladder. *J Clin Microbiol* 50(4): 1376-  
484 1383.  
485
- 486 5. Jones SM, Yerly J, Hu Y, Ceri H, Martinuzzi R. 2007. Structure of *Proteus*  
487 *mirabilis* biofilms grown in artificial urine and standard laboratory media.  
488 *FEMS Microbiol Letts* 268: 16-21.  
489
- 490 6. Macleod SM, Stickler DJ. 2007. Species interactions in mixed-community  
491 crystalline biofilms on urinary catheters. *J Med Microbiol* 56: 1549-1557.  
492

- 493 7. Stickler DJ, Morgan SD. 2008. Observations on the development of the  
494 crystalline bacterial biofilms that encrust and block Foley catheters. J Hosp  
495 Infect 69: 350-360.  
496
- 497 8. Morgan SD, Rigby D, Stickler DJ. 2009. A study of the structure of the  
498 crystalline bacterial biofilms that can encrust and block silver Foley catheters.  
499 Urol Res 37: 89-93.  
500
- 501 9. Broomfield RJ, Morgan SD, Khan A, Stickler DJ. 2009. Crystalline bacterial  
502 biofilm formation on urinary catheters by urease-producing urinary tract  
503 pathogens: a simple method of control. J Med Microbiol 58: 1367-1375.  
504
- 505 10. Djeribi R, Bouchloukh W, Jouenne T, Mena B. 2012. Characterization of  
506 bacterial biofilms formed on urinary catheters. Am J Infect Control 40: 854-  
507 859.  
508
- 509 11. Wilks SA, Fader MJ, Keevil CW. 2015. Novel insights into the *Proteus*  
510 *mirabilis* crystalline biofilm using real-time imaging. PLoS ONE 10(10):  
511 e0141711.  
512
- 513 12. Regev-Shoshani G, Ko M, Crowe A, Av-Gay Y. 2011. Comparative  
514 efficacy of commercially available and emerging antimicrobial urinary  
515 catheters against bacteriuria caused by *E. coli* in vitro. Urology 78: 334-340.  
516

- 517 13. Fisher LE, Hook AL, Ashraf W, Yousef A, Barrett DA, Scurr DJ, Chen X,  
518 Smith EF, Fay M, Parmenter CDJ, Parkinson R, Bayston R. 2015. Biomaterial  
519 modification of urinary catheters with antimicrobials to give long-term  
520 broadspectrum antibiofilm activity. *J Cont Rel* 202: 57-64.  
521
- 522 14. Lim K, Chua RRY, Bow H, Tambyah PA, Hadinoto K, Leong SSJ. 2015.  
523 Development of a catheter functionalized by a polydopamine peptide coating  
524 with antimicrobial and antibiofilm properties. *Acta Biomat* 15: 127-138.  
525
- 526 15. Maki DG, Tambyah PA. 2001. Engineering out the risk for infection with  
527 urinary catheters. *Emer Infect Dis* 7(2): 342-347.  
528
- 529 16. Johnson JR, Delavari P, Azar M. 1999. Activities of a nitrofurazone-  
530 containing urinary catheter and a silver hydrogel catheter against multidrug-  
531 resistant bacteria characteristic of catheter-associated urinary tract infection.  
532 *Antimicrob Agents Chem* 43(12): 2990-2995.  
533
- 534 17. Ahearn DG, Grace DT, Jennings MJ, Borazjani RN, Boles KJ, Rose LJ,  
535 Simmons RB, Ahanotu EN. 2000. Effects of hydrogel/silver coatings on in  
536 vitro adhesion to catheters of bacteria associated with urinary tract infections.  
537 *Curr Microbiol* 41: 120-125.  
538
- 539 18. Samuel U, Guggenbicher JP. 2004. Prevention of catheter-related  
540 infections: the potential of a new nano-silver impregnated catheter. *Int J*  
541 *Antimicrob Agents* 23S1: S75-S78.

542

543 19. Pickard R, Lam T, MacLennan G, Starr K, Kilonzo M, McPherson G,  
544 Gillies K, McDonald A, Walton K, Buckley B, Glazener C, Boachie C, Burr J,  
545 Norrie J, Vale L, Grant A, N'Dow J. 2012. Antimicrobial catheters for reduction  
546 of symptomatic urinary tract infection in adults requiring short-term  
547 catheterization in hospital: a multicentre randomized controlled trial. *Lancet*  
548 380: 1927-1935.

549

550 20. Li L, Mendis N, Trigui H, Oliver JD, Faucher SP. 2014. The importance of  
551 the viable but non-culturable state in human bacterial pathogens. *Front*  
552 *Microbiol* 5: 258.

553

554 21. Ayrapetyan M, Williams T, Oliver, JD. 2018. Relationship between the  
555 viable but nonculturable state and antibiotic persister cells. *J Bacteriol* 200:  
556 e00249-18.

557

558 22. Highmore CJ, Warner JC, Rothwell SD, Wilks SA, Keevil CW. 2018.  
559 Viable-but-nonculturable *Listeria monocytogenes* and *Salmonella enterica*  
560 Serovar Thompson induced by chlorine stress remain infectious. *mBio* 9:  
561 e00540-18.

562

563 23. Gião MS, Wilks SA, Azevedo NF, Vieira MJ, Keevil CW. 2009. Validation  
564 of SYTO9/propidium iodide uptake for rapid detection of viable but  
565 noncultivable *Legionella pneumophila*. *Microb Ecol* 58: 56.

566

- 567 24. Pasquaroli S, Zandri G, Vignaroli C, Vuotto C, Donelli G, Biavasco F.  
568 2013. Antibiotic pressure can induce the viable but non-culturable state in  
569 *Staphylococcus aureus* growing in biofilms. J Antimicrob Chem 68(8): 1812-  
570 1817.  
571
- 572 25. Gabriel MM, Mayo MS, May LL, Simmons RB, Ahearn DG. 1996. *In vitro*  
573 evaluation of the efficacy of a silver-coated catheter. Curr Microbiol 33: 1-5.  
574
- 575 26. Saint SS, Elmore JG, Sullivan SD, Emerson JG, Koepsell TD. 1998. The  
576 efficacy of silver alloy-coated urinary catheters in preventing urinary tract  
577 infection: a meta analysis. Am J Med 105: 236-241.  
578
- 579 27. Johnson JR, Kuskowski MA, Witt TJ. 2006. Systematic review:  
580 antimicrobial urinary catheters to prevent catheter-associated urinary tract  
581 infection in hospitalized patients. Ann Intern Med 144: 116-126.  
582
- 583 28. Trautner BW, Darouiche RO. 2004. Catheter-associated infections:  
584 pathogenesis affects prevention. Arch Intern Med 164: 842-850.  
585
- 586 29. Davenport K, Keeley FX. 2005. Evidence for the use of silver-alloy-coated  
587 urethral catheters. J Hosp Infect 60: 298-303.  
588
- 589 30. Rupp ME, Fitzgerald T, Marion N, Helget V, Puumala S, Anderson JR,  
590 Fey PD. 2004. Effect of silver-coated urinary catheters: Efficacy, cost-



- 591 effectiveness, and antimicrobial resistance. Amer J Infect Cont 32(8): 445-  
592 450.  
593
- 594 31. Seymour C. 2006. Audit of catheter-associated UTI using silver alloy-  
595 coated Foley catheters. Br J Nurs 15(11): 598-603.  
596
- 597 32. Colwell RR. 2000. Viable but nonculturable bacteria: a survival strategy. J  
598 Infect Chem 6: 121-125.  
599
- 600 33. Oliver JD, Hite F, McDougald D, Andon NL, Simpson LM. 1995. Entry into,  
601 and resuscitation from, the viable but nonculturable state by *Vibrio vulnificus*  
602 in an estuarine environment. Appl Environ Microbiol 61: 2624-2630.  
603
- 604 34. Gião MS, Azevedo NF, Wilks SA, Vieira MJ, Keevil CW. 2010. Effects of  
605 chlorine on incorporation of *Helicobacter pylori* into drinking water biofilms.  
606 Appl Environ Microbiol 76: 1669-1673.  
607
- 608 35. Fisher RA, Gollan B, Helaine S. 2017. Persistent bacterial infection and  
609 persister cells. Nat Rev Microbiol 15: 453-464.  
610
- 611 36. Kim JS, Chowdhury N, Yamasaki R, Wood TK. 2018. Viable but non-  
612 culturable and persistence describe the same bacterial stress state. Environ  
613 Microbiol 20: 2038-2048.  
614

- 615 37. Bamford RA, Smith A, Metz J, Glover G, Titball RW, Pagliara S. 2017.  
616 Investigating the physiology of viable but non-culturable bacteria by  
617 microfluidics and time-lapse microscopy. BMC Biol 15: 121.  
618
- 619 38. Keevil CW. 2003. Rapid detection of biofilms and adherent pathogens  
620 using scanning confocal laser microscopy and episcopic differential  
621 interference contrast microscopy. Wat Sci Technol 47(5): 105-116.  
622
- 623 39. Zandri G, Pasquaroli S, Vignaroli C, Talevi S, Manso E, Donelli G,  
624 Biavasco F. 2012. Detection of viable but non-culturable staphylococci in  
625 biofilms from central venous catheters negative on standard microbiological  
626 assays. Clin Microbiol Infect 18: E259-261.  
627
- 628 40. Mulvery MA, Schilling JD, Hultgren SJ. 2001. Establishment of a  
629 persistent *Escherichia coli* reservoir during the acute phase of a bladder  
630 infection Infect Immunol 69: 4572-4579.  
631
- 632 41. Brooks T, Keevil CW. 1997. A simple artificial urine for the growth of  
633 urinary pathogens. Letts Appl Microbiol 24: 203-206.  
634  
635

1 **FIGURE LEGENDS**

2 Figure 1. EDIC images of the surfaces of clean, unused catheters. a. silicone  
3 catheter. b. hydrogel latex catheter. c. silver alloy coated hydrogel latex catheter.  
4 (Magnification x 1000, bar = 10  $\mu\text{m}$ ).

5

6 Figure 2. EDIC images showing attachment of *E. coli* to silicone catheters in artificial  
7 urine. a. 2 h, b. 4 h, c. 6 h, d. 24 h, e. 48 h, f. 72 h exposure. (Magnification x 1000,  
8 bar = 10  $\mu\text{m}$ ).

9

10 Figure 3. EDIC images showing attachment of *P. aeruginosa* to silicone catheters in  
11 artificial urine. a. 2 h, b. 4 h, c. 6 h, d. 24 h, e. 48 h, f. 72 h exposure. (Magnification x  
12 1000, bar = 10  $\mu\text{m}$ ).

13

14 Figure 4. EDIC images showing attachment of *P. mirabilis* to silicone catheters in  
15 artificial urine. a. 2 h, b. 4 h, c. 6 h, d. 24 h, e. 48 h, f. 72 h exposure. (Magnification x  
16 1000, bar = 10  $\mu\text{m}$ ).

17

18 Figure 5. EDIC images showing attachment of *P. aeruginosa* to hydrogel latex  
19 catheters in artificial urine. a. 24 h, b. 48 h, c. 72 h exposure. (Magnification x 1000,  
20 bar = 10  $\mu\text{m}$ ).

21

22 Figure 6. EDIC images showing attachment of *P. mirabilis* to silver alloy coated  
23 hydrogel latex catheters in artificial urine. a. 24 h, b. 48 h, c. 72 h exposure.  
24 (Magnification x 1000, bar = 10  $\mu\text{m}$ ).

25

26 Figure 7. Graph showing the numbers of colony forming units (cfu), total cell counts  
27 (TCC) and dead cell counts (dead) per cm<sup>2</sup> over time following exposure to *E. coli*. a.  
28 silicone b. hydrogel latex, c. silver alloy hydrogel latex catheters. The percentage of  
29 VBNC population (colony forming units plus dead cell counts) in relation to total cell  
30 count are shown.

31

32 Figure 8. Graph showing the numbers of colony forming units (cfu), total cell counts  
33 (TCC) and dead cell counts (dead) per cm<sup>2</sup> over time following exposure to *P.*  
34 *aeruginosa*. a. silicone b. hydrogel latex, c. silver alloy hydrogel latex catheters. The  
35 percentage of VBNC population (colony forming units plus dead cell counts) in  
36 relation to total cell count are shown.

37

38 Figure 9. Graph showing the numbers of colony forming units (cfu), total cell counts  
39 (TCC) and dead cell counts (dead) per cm<sup>2</sup> over time following exposure to *P.*  
40 *mirabilis*. a. silicone b. hydrogel latex, c. silver alloy hydrogel latex catheters. The  
41 percentage of VBNC population (colony forming units plus dead cell counts) in  
42 relation to total cell count are shown.

43

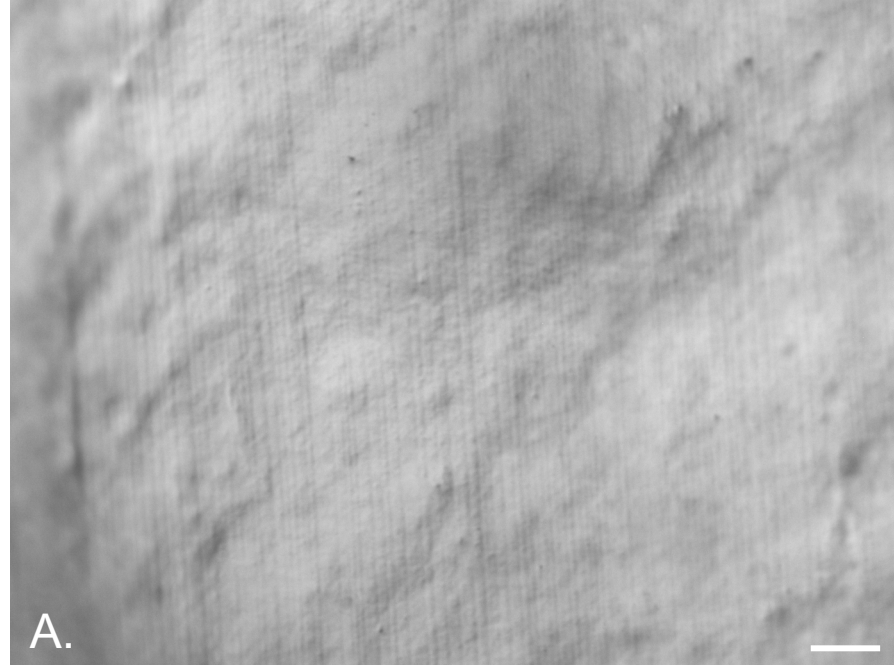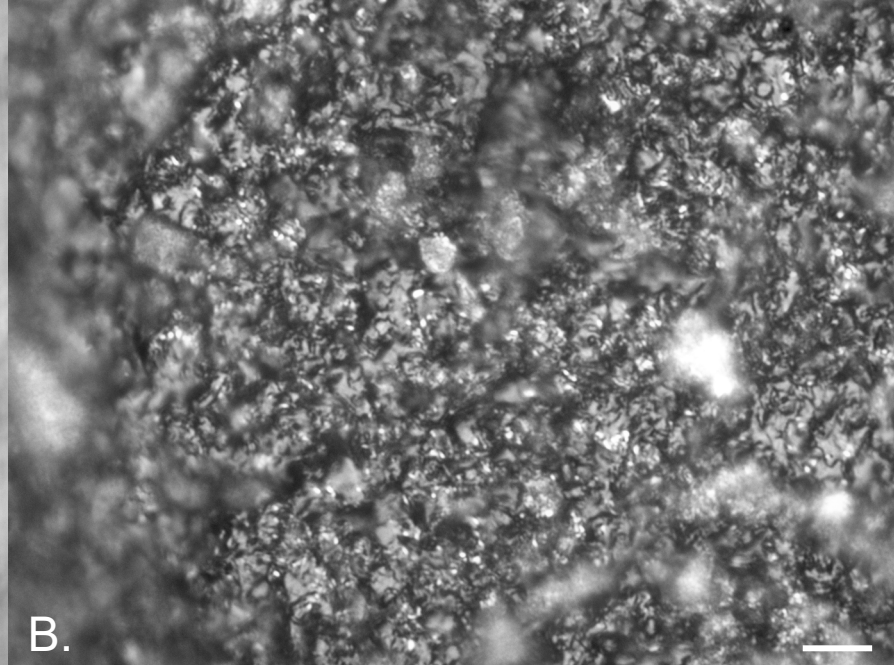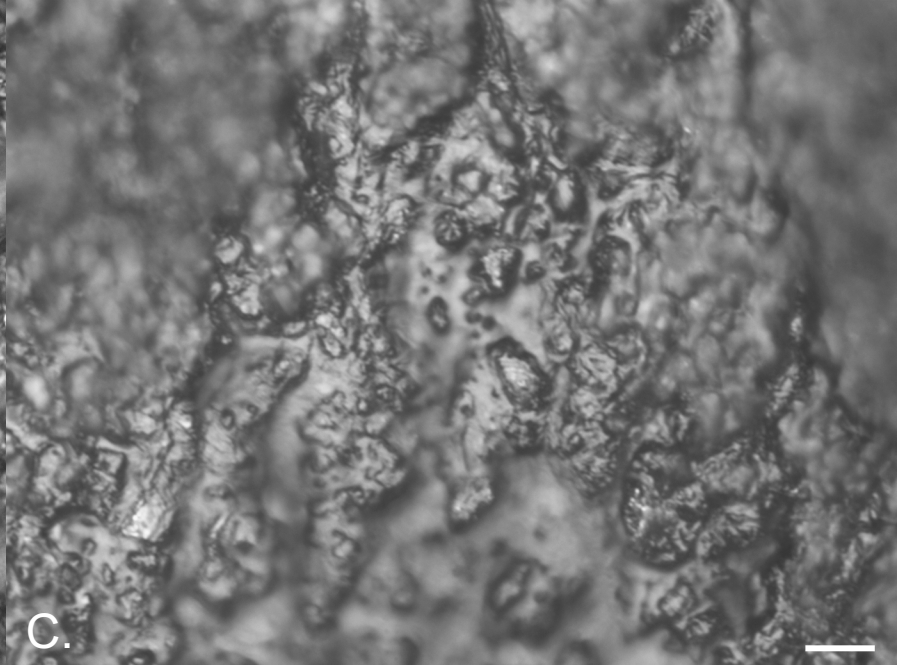



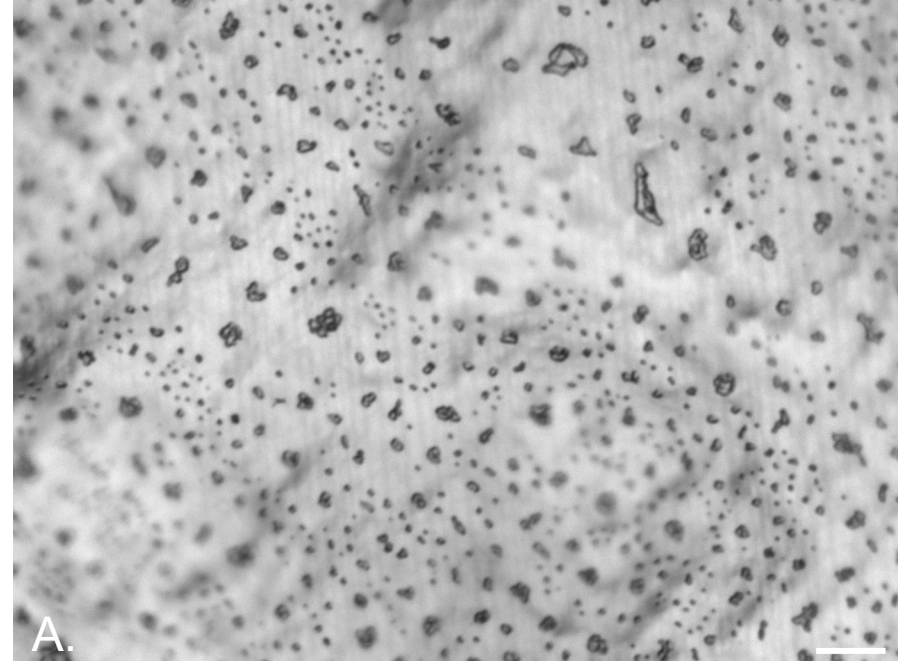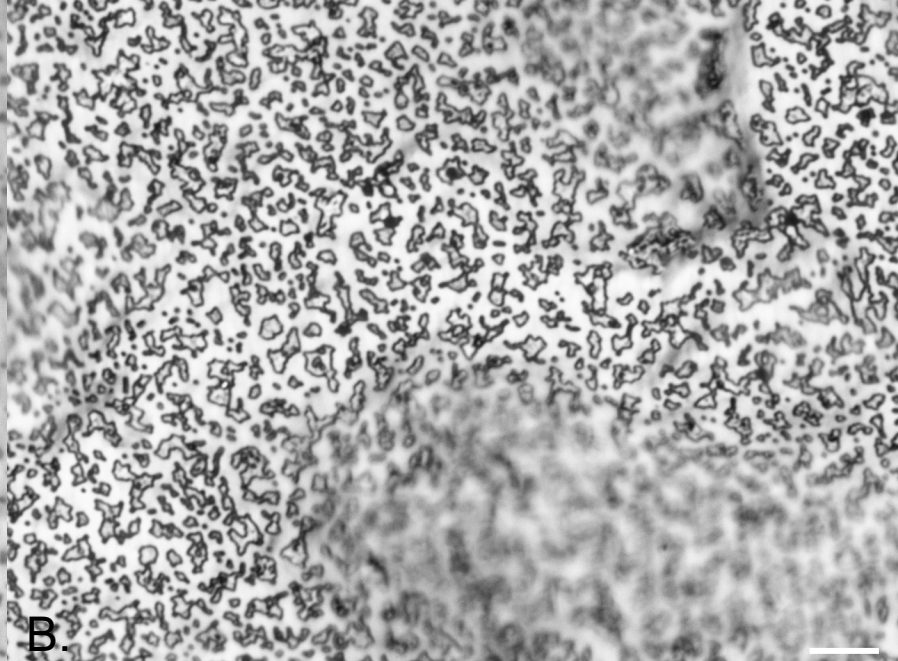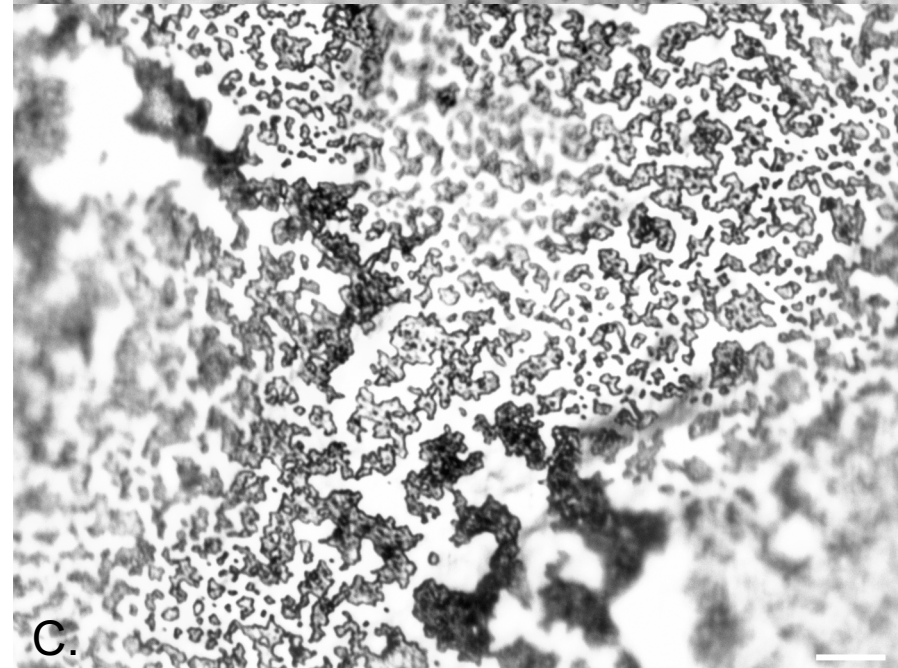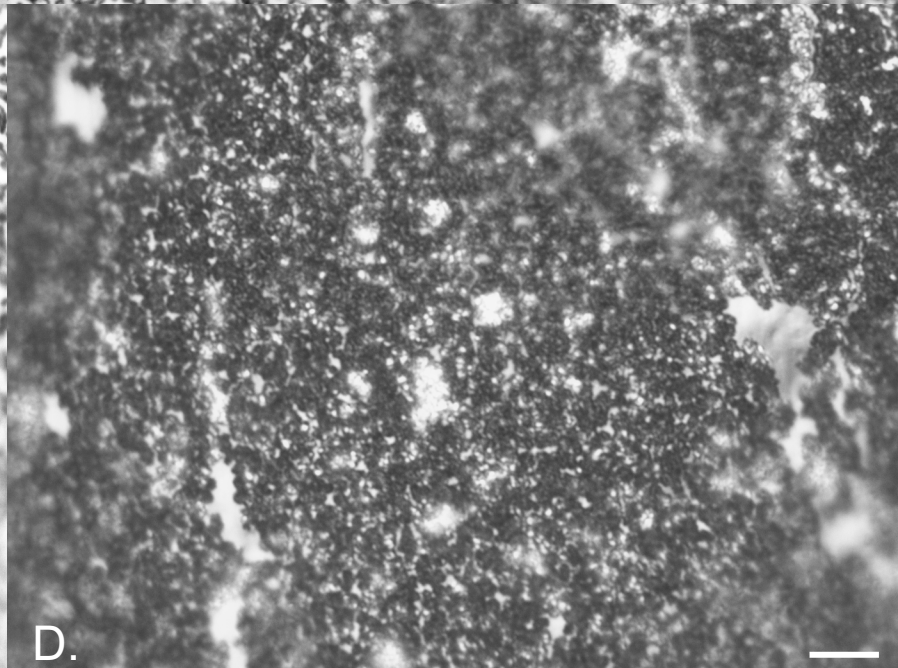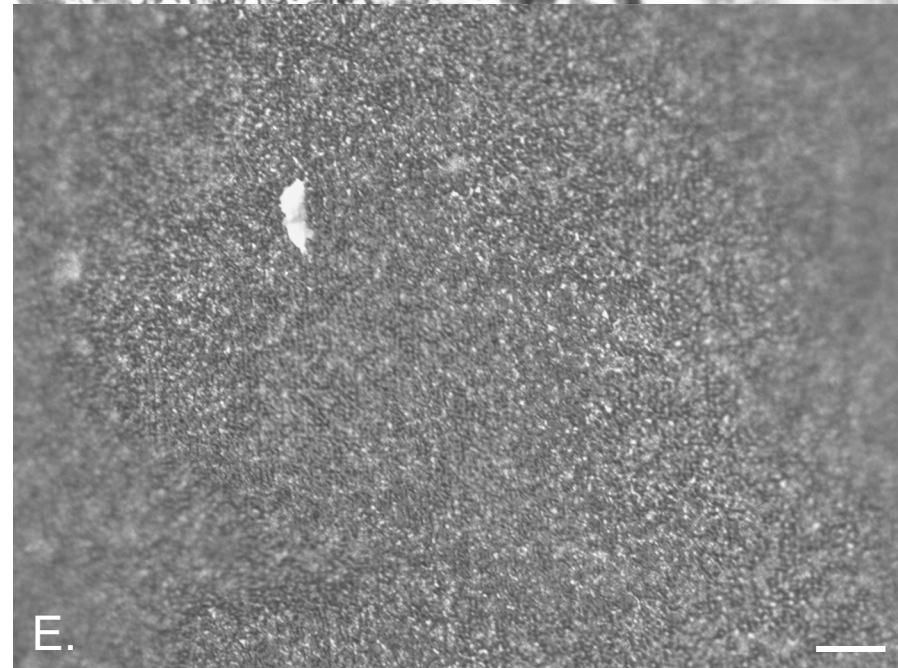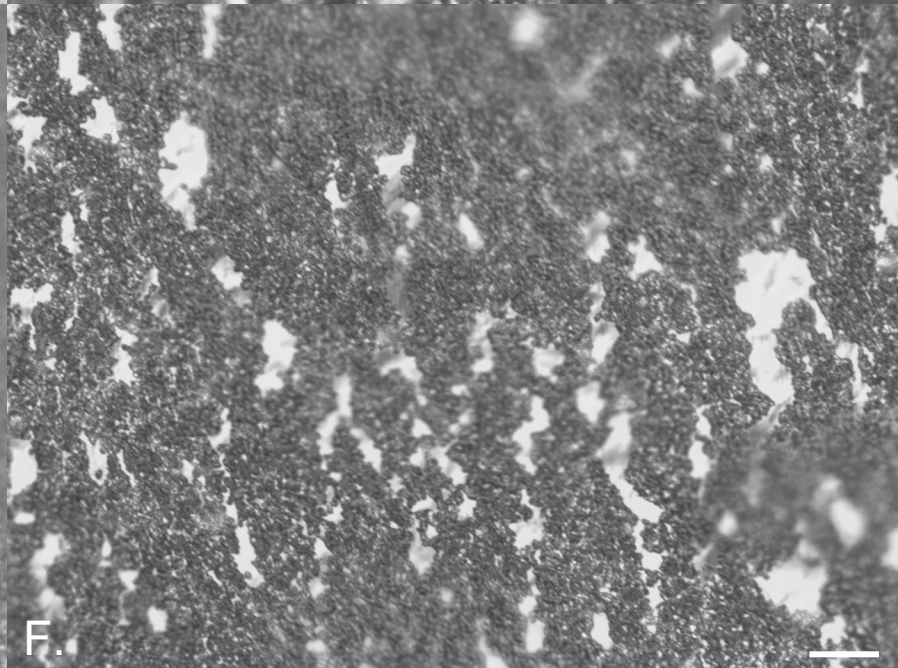

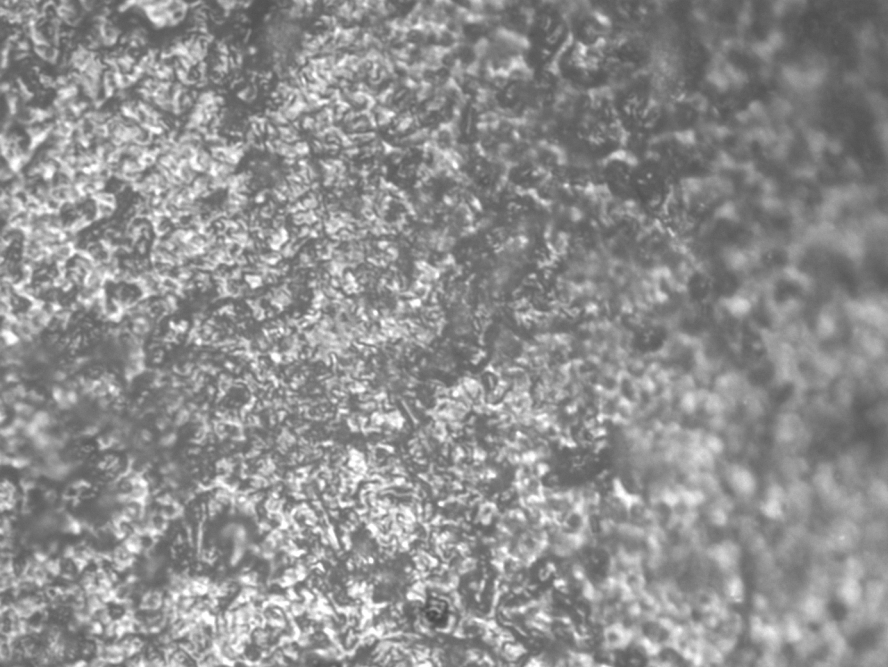

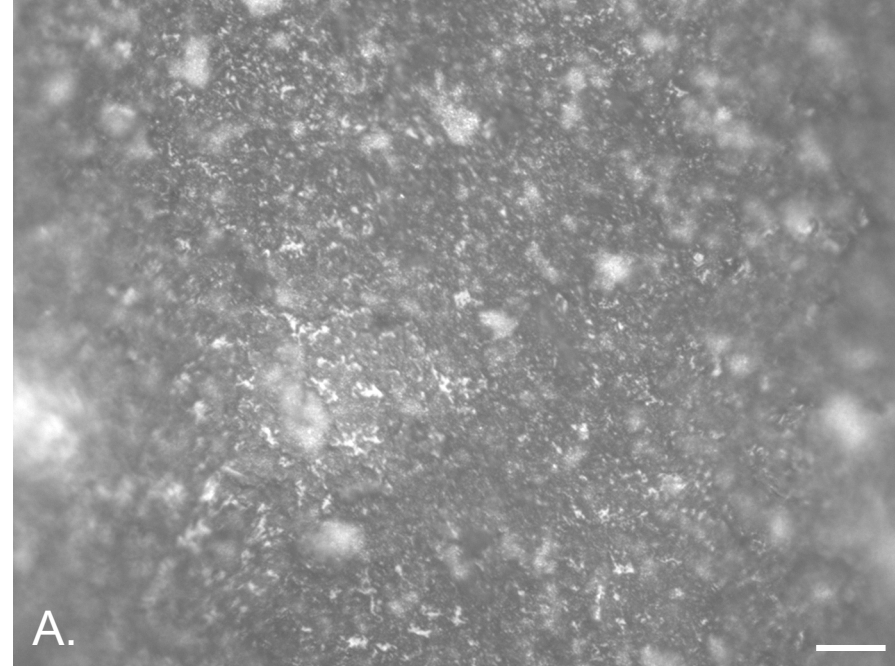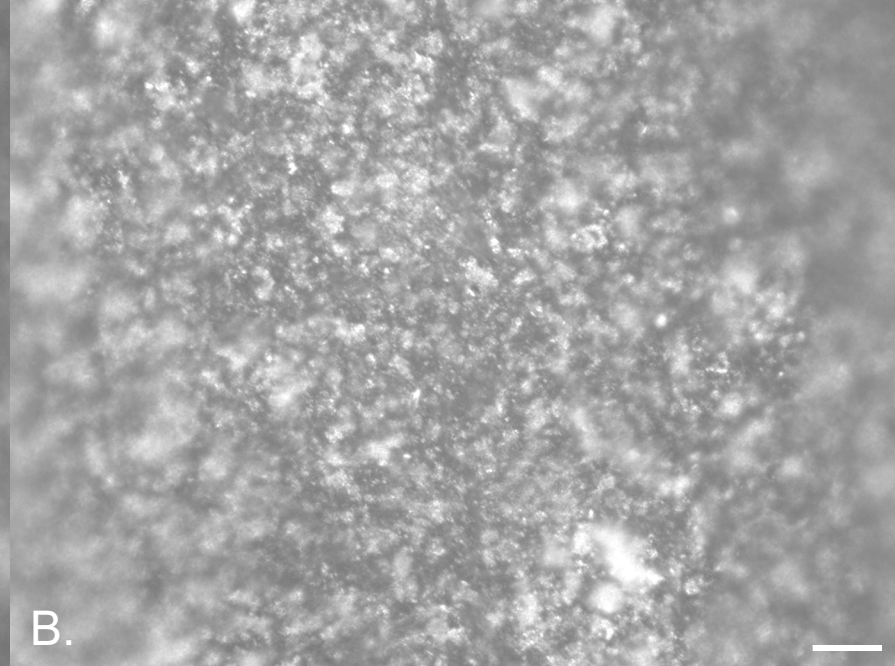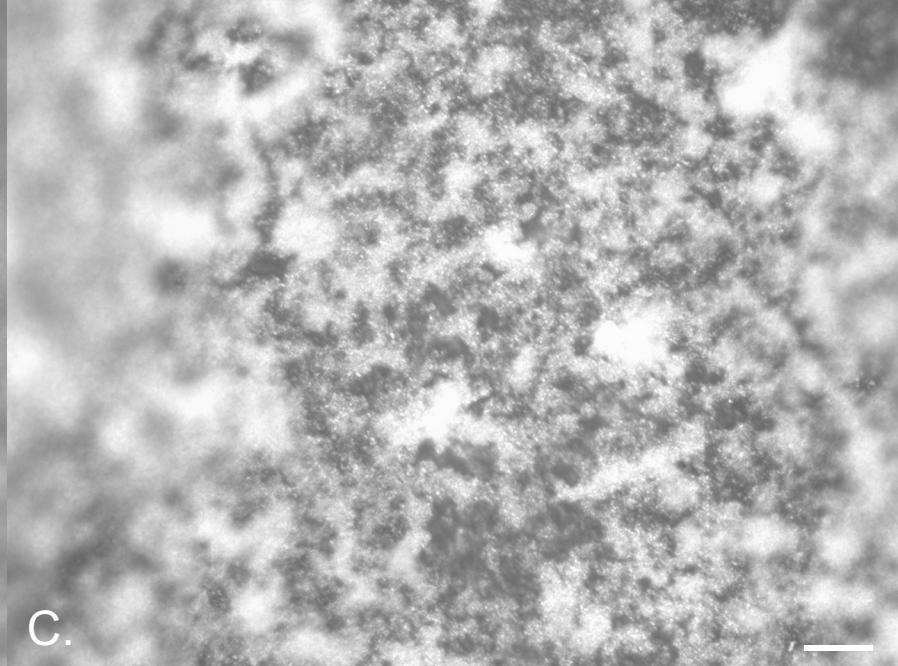



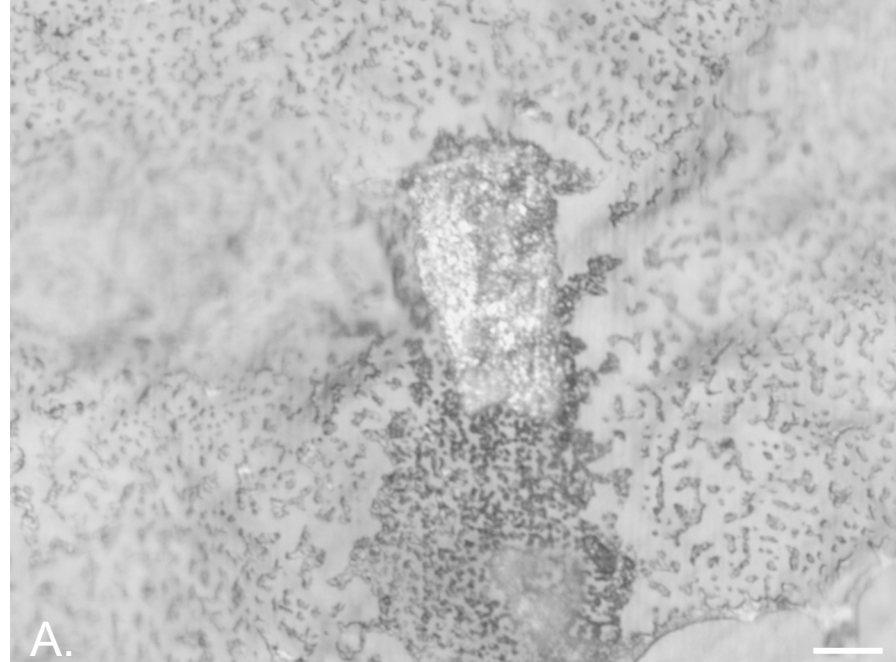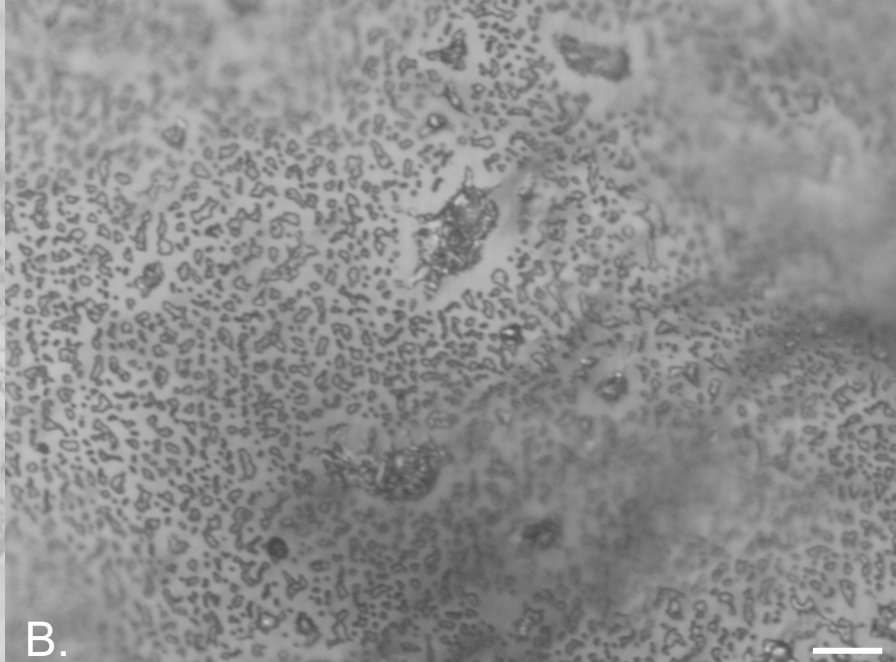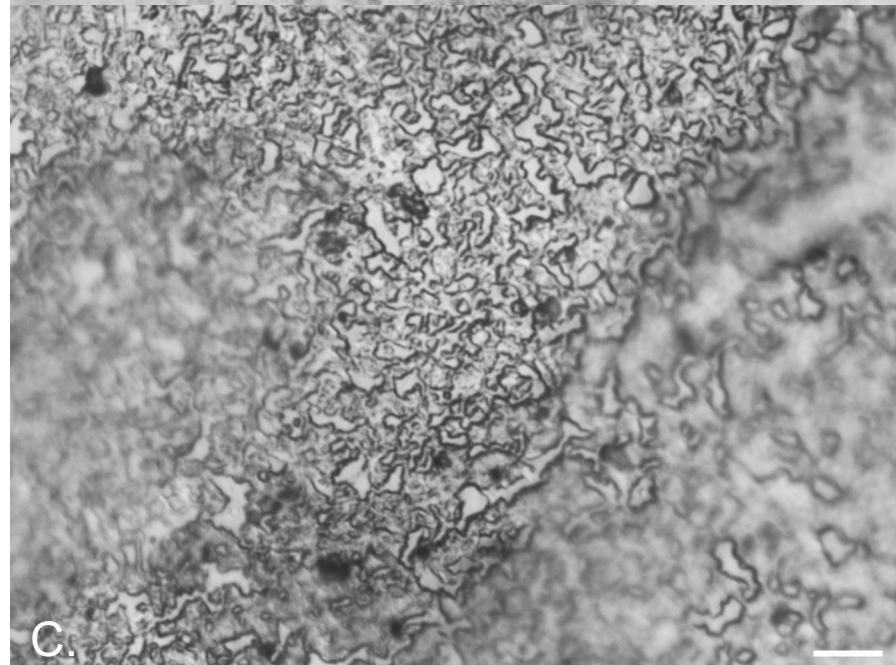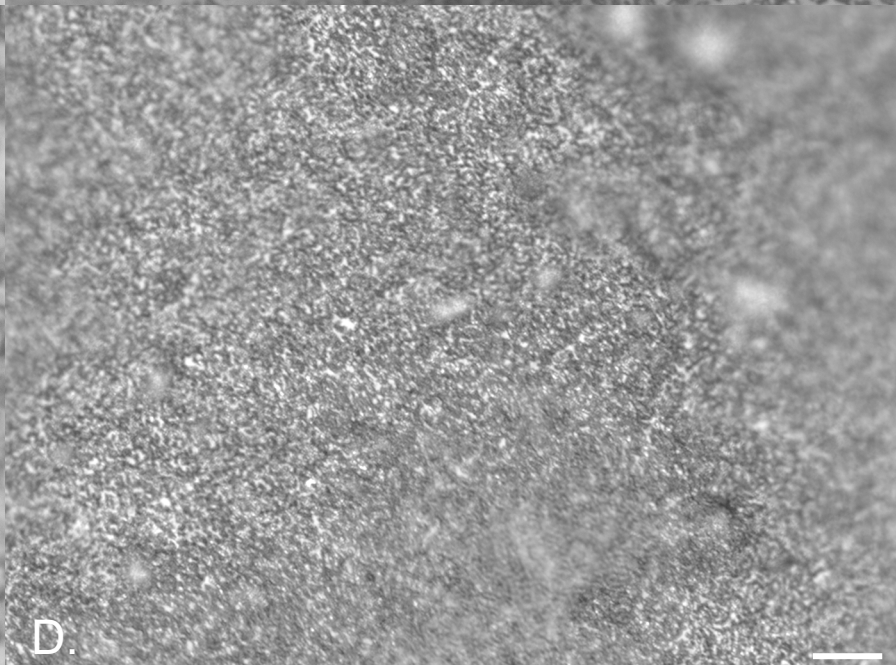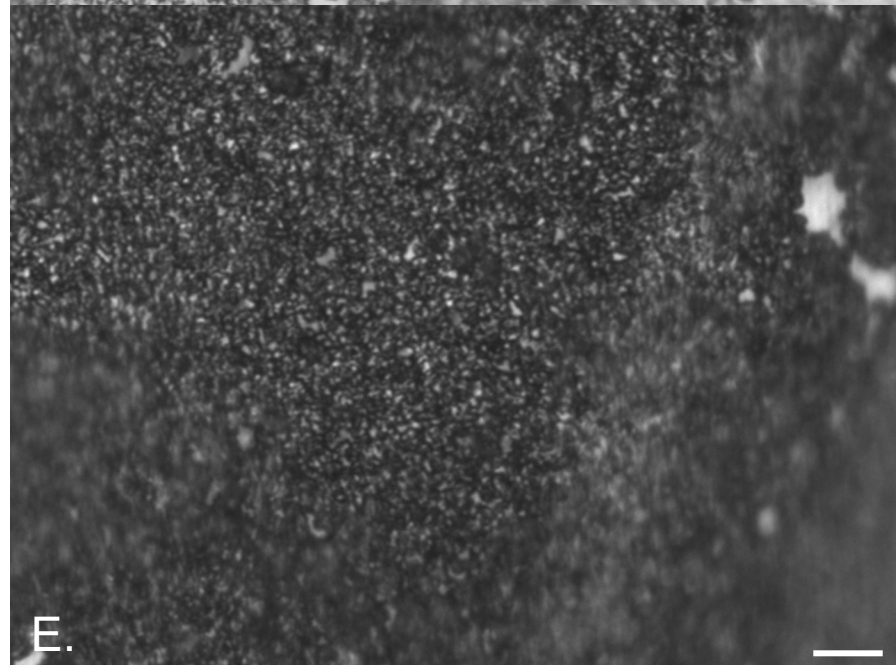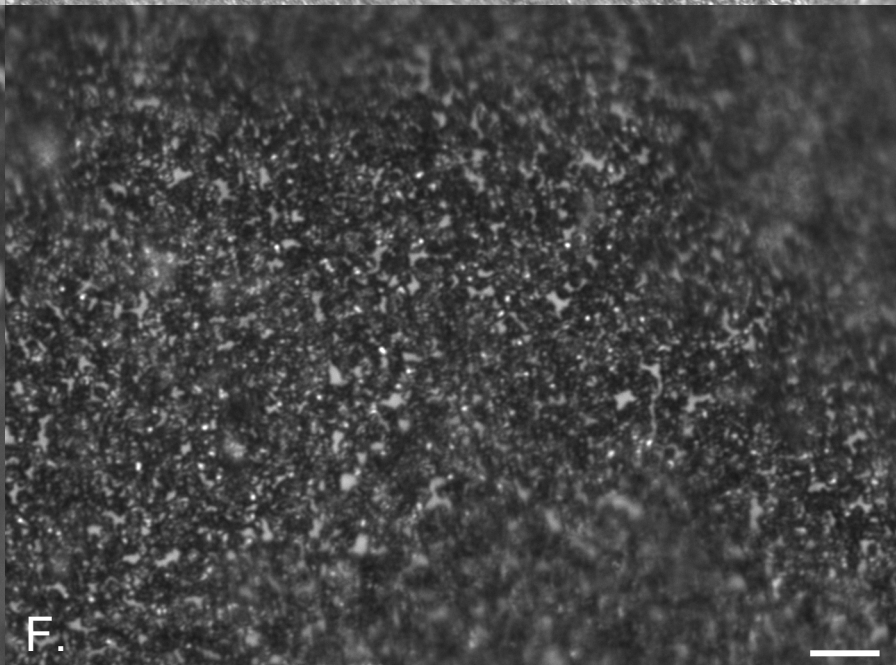

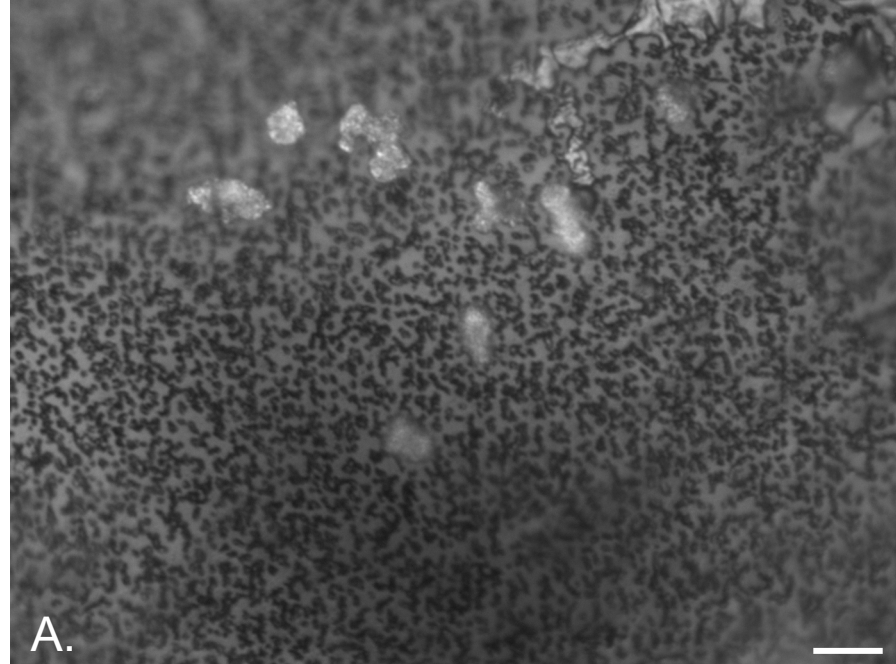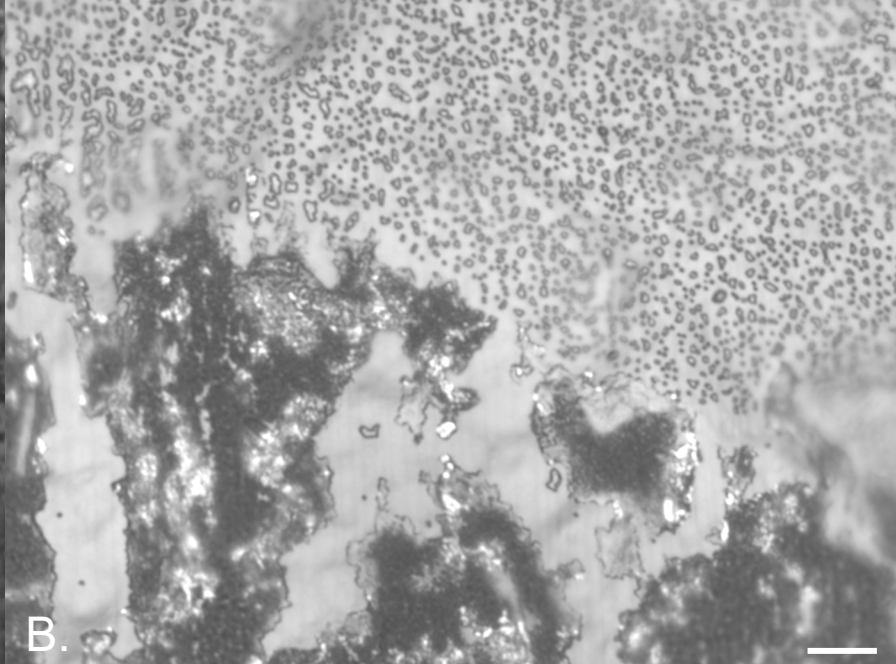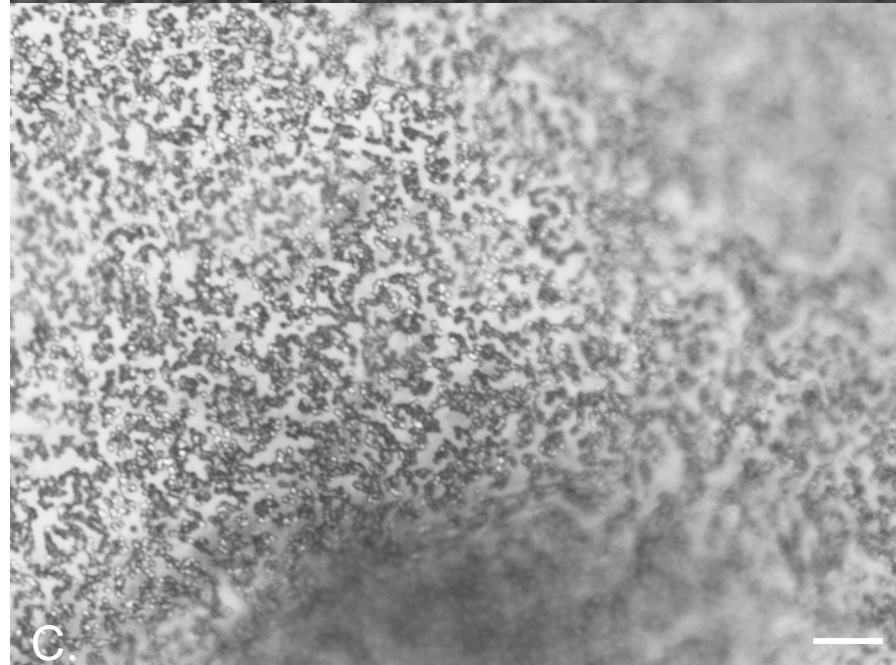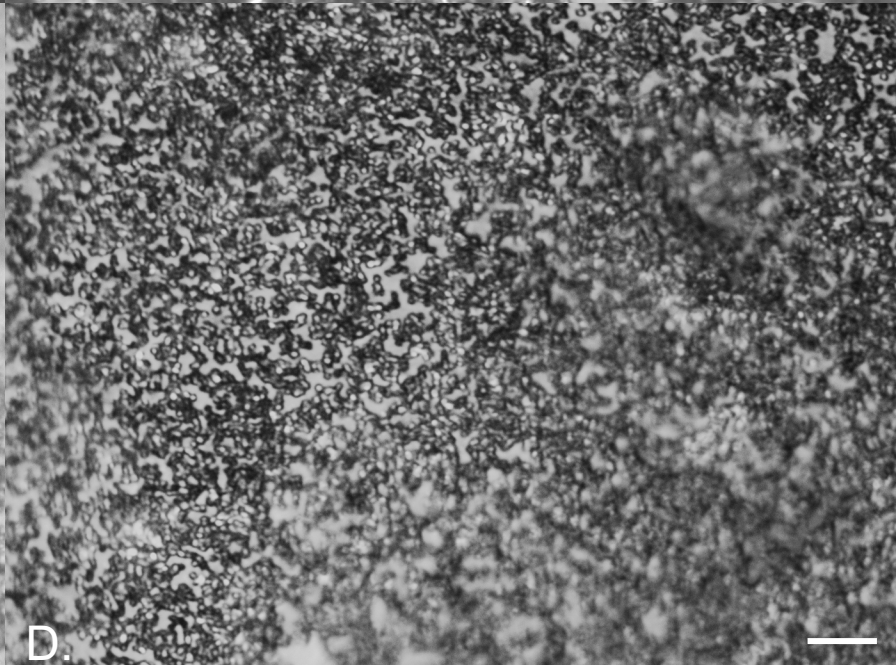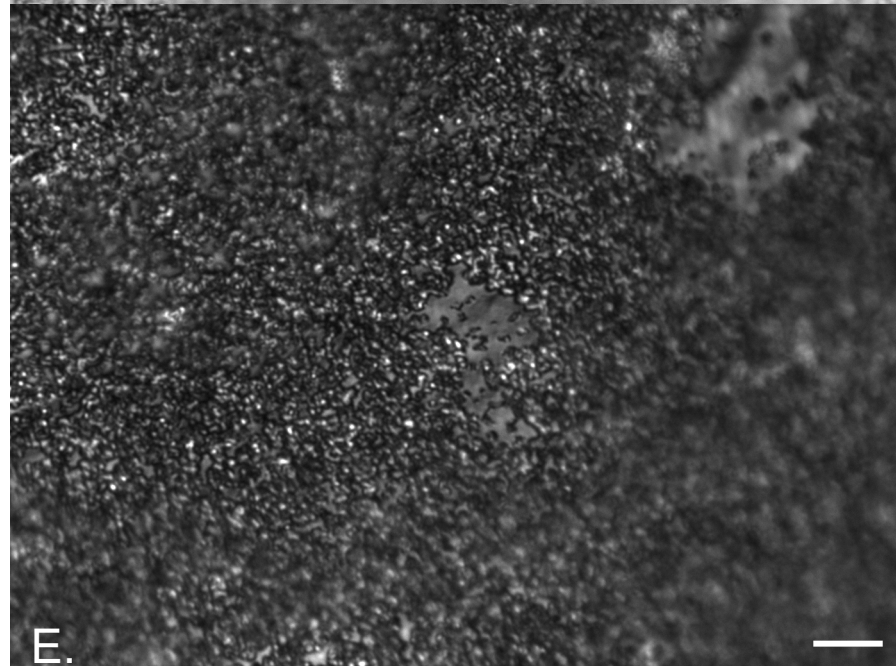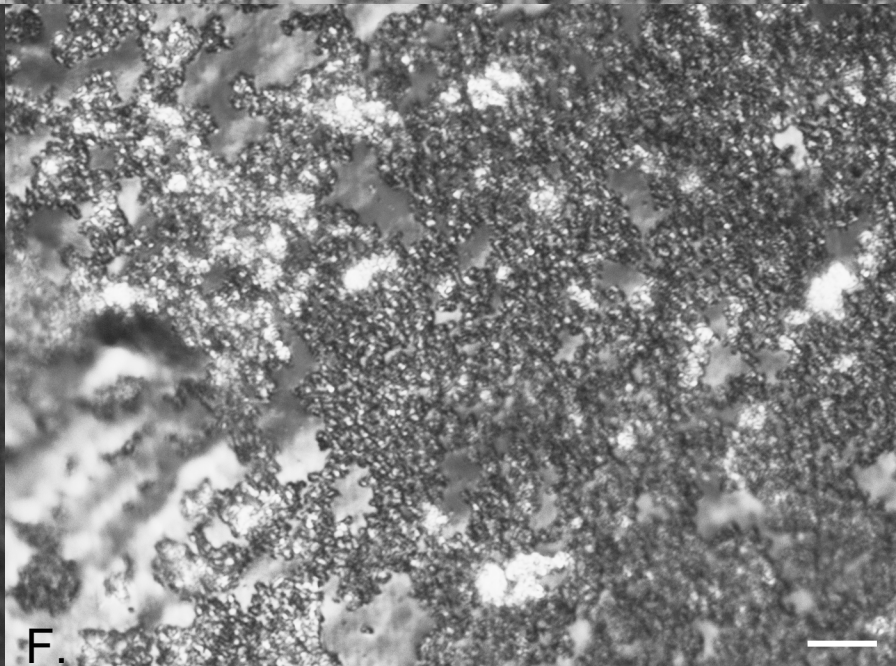

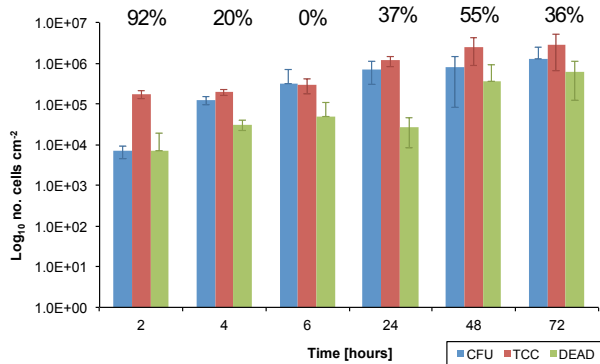

a.

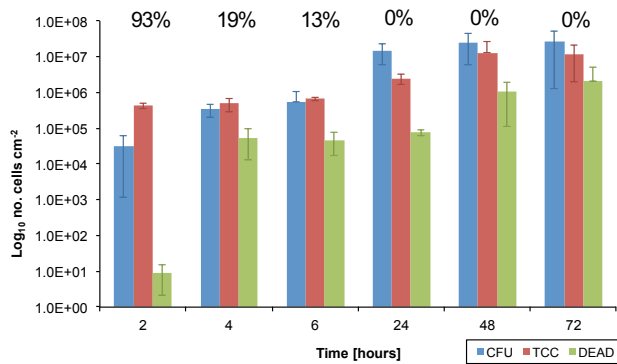

b.

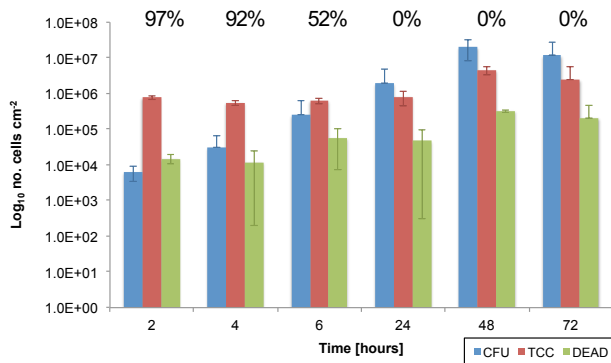

c.

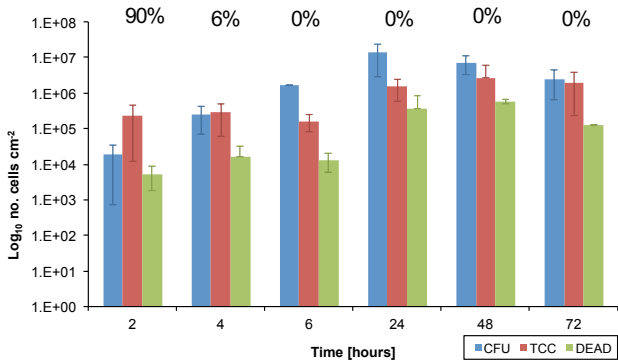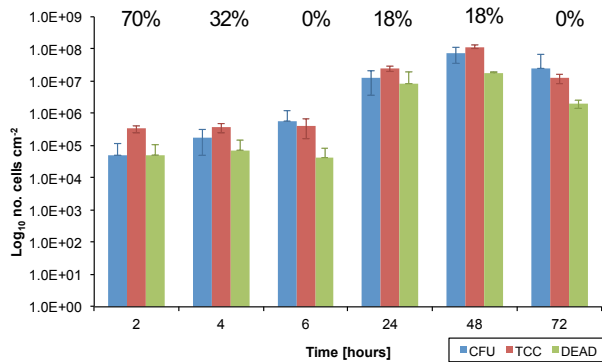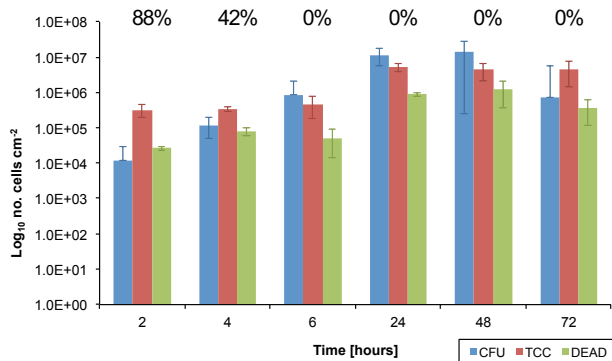

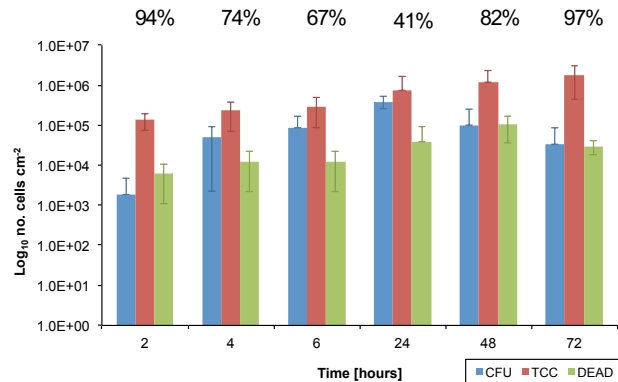

a.

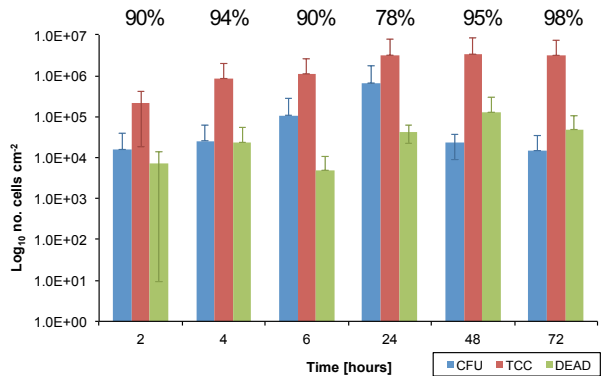

b.

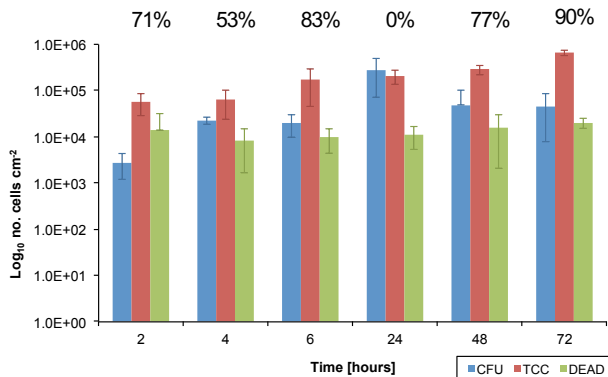

c.
